# Supplementary material
Source: PubMed Central journal article supplement (PMC3148311)
Supplement: NIHMS302509-supplement-6.pdf [file NIHMS302509-supplement-6.pdf]

**Supplementary Table 1. Proteins with plasma case/control ratios up- or down-regulated >1.5-fold**

**(p<0.05) or “cancer only\*” at the preclinical time point.**

| Gene                 | Cellular Location | Case/Control Ratio |
|----------------------|-------------------|--------------------|
| <b>Up-Regulated:</b> |                   |                    |
| Acaa2                | Cytoplasm         | 2.42               |
| Actb                 | Cytoplasm         | 1.56               |
| Ak2                  | Cytoplasm         | 1.85               |
| Aldoa                | Cytoplasm         | 1.62               |
| Calr                 | Cytoplasm         | 2.08               |
| Chchd2               | Cytoplasm         | 2.30               |
| Ckm                  | Cytoplasm         | 1.95               |
| Cnn2                 | Cytoplasm         | 1.85               |
| Etfa                 | Cytoplasm         | 2.31               |
| Etfb                 | Cytoplasm         | 2.60               |
| Fkbp2                | Cytoplasm         | 3.09               |
| Gapdhs               | Cytoplasm         | 1.94               |
| Hadh                 | Cytoplasm         | 3.29               |
| Hmgcl                | Cytoplasm         | Cancer Only        |
| Mb                   | Cytoplasm         | 1.81               |
| Mdh2                 | Cytoplasm         | 2.55               |
| Myl6                 | Cytoplasm         | 2.39               |
| Pdim5                | Cytoplasm         | 2.15               |
| S100a8               | Cytoplasm         | 3.24               |
| S100a9               | Cytoplasm         | 4.66               |
| Tagln                | Cytoplasm         | 12.8               |
| Try4                 | Cytoplasm         | 2.22               |
| Ywhah                | Cytoplasm         | 1.99               |
| 2210010C04Rik        | Extracellular     | 2.69               |
| Adamts15             | Extracellular     | 5.13               |
| Ambp                 | Extracellular     | 2.24               |
| Apob                 | Extracellular     | 1.53               |
| C8b                  | Extracellular     | 1.96               |
| C8g                  | Extracellular     | 1.70               |
| Ccl8                 | Extracellular     | 2.40               |
| Clps                 | Extracellular     | 12.44              |
| Ela2a                | Extracellular     | 2.78               |
| Ela3                 | Extracellular     | 2.68               |
| Fbln5                | Extracellular     | 1.57               |
| Hp                   | Extracellular     | 6.41               |
| Itih1                | Extracellular     | 1.73               |

| Gene                   | Cellular Location | Case/Control Ratio |
|------------------------|-------------------|--------------------|
| <b>Up-Regulated:</b>   |                   |                    |
| Itih2                  | Extracellular     | 1.74               |
| Lcn2                   | Extracellular     | 14.18              |
| Lgals1                 | Extracellular     | 1.53               |
| Lrg1                   | Extracellular     | 2.04               |
| Ltf                    | Extracellular     | 2.04               |
| Ngp                    | Extracellular     | 6.63               |
| OTTMUSG00000022462     | Extracellular     | 2.69               |
| Papln                  | Extracellular     | 1.71               |
| Prss2                  | Extracellular     | 3.94               |
| Sycn                   | Extracellular     | 3.06               |
| Tff2                   | Extracellular     | 4.08               |
| Tff3                   | Extracellular     | 3.16               |
| Timp1                  | Extracellular     | 1.53               |
| Anxa1                  | Plasma Membrane   | Cancer Only        |
| Cap1                   | Plasma Membrane   | Cancer Only        |
| OTTMUSG00000005300     | Unknown           | 1.72               |
| <b>Down-Regulated:</b> |                   |                    |
| Eef1a1                 | Cytoplasm         | 0.66               |
| Gzmf                   | Cytoplasm         | 0.22               |
| Olfm1                  | Cytoplasm         | 0.63               |
| Si                     | Cytoplasm         | 0.57               |
| 2610016E04Rik          | Extracellular     | 0.61               |
| 5430402E10Rik          | Extracellular     | 0.62               |
| A1bg                   | Extracellular     | 0.48               |
| Inhbe                  | Extracellular     | 0.66               |
| Mup1                   | Extracellular     | 0.62               |
| Mup2                   | Extracellular     | 0.65               |
| Proz                   | Extracellular     | 0.60               |
| Adam10                 | Plasma Membrane   | 0.41               |
| Lifr                   | Plasma Membrane   | 0.65               |
| Megf9                  | Plasma Membrane   | 0.56               |
| 4930473A06Rik          | Unknown           | 0.54               |
| Camta2                 | Unknown           | 0.07               |
| Fsip2                  | Unknown           | 0.02               |
| Kif26a                 | Unknown           | 0.38               |

\*“Cancer Only” refers to proteins with detected peptides labeled with only the heavy form of acrylamide
